# Supplementary material for: Bee colony remote monitoring based on IoT using ESP-NOW protocol
Source: PeerJ journal article supplement (doi:10.7717/peerj-cs.1363), 2023-04-27
Supplement: data.zip [file data.zip]

## Sheet: data
Timestamp	Hive 1	Hive 2	Hive 3	Hive 4
2022-05-31 21:00:00			32.625
2022-05-31 21:20:00	33.875	34.875	33.0625
2022-05-31 21:50:00	34	34.875	33.1875
2022-05-31 22:20:00	34.0625	34.875	32.9375
2022-05-31 22:51:00	34	35.0625	32.5625
2022-05-31 23:11:00		34.75
2022-05-31 23:21:00	34		32.875
2022-05-31 23:41:00		34.75
2022-05-31 23:51:00	34.0625		32.6875
2022-06-01 00:11:00		35.0625
2022-06-01 00:21:00	34.0625		32.875
2022-06-01 00:41:00		34.875
2022-06-01 00:51:00	34.125		32.5
2022-06-01 01:11:00		34.6875
2022-06-01 01:21:00	33.9375		32.8125
2022-06-01 01:42:00	34.0625	34.875
2022-06-01 01:52:00			32.6875
2022-06-01 02:12:00	33.9375	34.875	33.0625
2022-06-01 02:42:00	33.9375	35	32.75
2022-06-01 03:12:00	33.875	34.8125	32.8125
2022-06-01 03:42:00	33.9375	35	32.4375
2022-06-01 04:12:00	33.75	35.0625	32.75
2022-06-01 04:33:00		34.875
2022-06-01 04:43:00	33.9375		32.4375
2022-06-01 05:03:00		35.0625
2022-06-01 05:13:00	33.8125		33.0625
2022-06-01 05:33:00		35
2022-06-01 05:43:00	33.875		32.8125
2022-06-01 06:03:00		35.3125
2022-06-01 06:13:00	33.9375		32.9375
2022-06-01 06:33:00		35.1875
2022-06-01 06:43:00	33.9375		33.25
2022-06-01 07:04:00		35.25
2022-06-01 07:14:00	34.0625		32.8125
2022-06-01 07:24:00				34.8125
2022-06-01 07:34:00	34.0625	35.125
2022-06-01 07:44:00			32.75
2022-06-01 07:54:00				34.8125
2022-06-01 08:04:00	34.125	35.1875	33.4375
2022-06-01 08:24:00				34.875
2022-06-01 08:34:00	34.125	35.1875	33.625
2022-06-01 08:54:00				34.9375
2022-06-01 09:04:00	33.9375	35.1875	33.875
2022-06-01 09:14:00				35
2022-06-01 09:34:00	34.125	35.25	33.875
2022-06-01 09:44:00				34.9375
2022-06-01 10:04:00	34.125	35.125	33.875
2022-06-01 10:14:00				34.9375
2022-06-01 10:34:00	34.125	35.125	33.8125
2022-06-01 10:44:00				34.9375
2022-06-01 10:54:00		34.9375
2022-06-01 11:04:00	34		33.4375
2022-06-01 11:14:00				34.875
2022-06-01 11:24:00		34.75
2022-06-01 11:34:00	34		33.3125
2022-06-01 11:44:00				34.875
2022-06-01 11:54:00		35.0625
2022-06-01 12:04:00	34		33.3125
2022-06-01 12:14:00				34.9375
2022-06-01 12:24:00		34.8125
2022-06-01 12:34:00	33.8125		32.4375
2022-06-01 12:44:00				34.8125
2022-06-01 12:54:00		34.875
2022-06-01 13:04:00	33.6875		32.0625
2022-06-01 13:14:00				34.6875
2022-06-01 13:24:00		34.75
2022-06-01 13:34:00	33.6875		32
2022-06-01 13:54:00	33.625	34.9375	32.25
2022-06-01 14:25:00	33.6875	34.75	32.125
2022-06-01 14:55:00	33.625	34.875	31.875
2022-06-01 15:05:00				34.5625
2022-06-01 15:25:00	33.5	34.875	31.75
2022-06-01 15:35:00				34.625
2022-06-01 15:55:00	33.5	35	31.8125
2022-06-01 16:05:00				34.625
2022-06-01 16:25:00	33.5	34.9375	31.625
2022-06-01 16:35:00				34.5625
2022-06-01 16:45:00		34.9375
2022-06-01 16:55:00	33.5		31.625
2022-06-01 17:05:00				34.4375
2022-06-01 17:15:00		34.9375
2022-06-01 17:25:00	33.5		31.75
2022-06-01 17:35:00				34.5625
2022-06-01 17:45:00		34.875
2022-06-01 17:55:00	33.4375		31.6875
2022-06-01 18:05:00				34.5
2022-06-01 18:15:00		34.875
2022-06-01 18:25:00	33.375		31.4375
2022-06-01 18:35:00				34.5
2022-06-01 18:45:00		35
2022-06-01 18:55:00	33.3125		32.0625
2022-06-01 19:05:00				34.6875
2022-06-01 19:15:00		34.875
2022-06-01 19:25:00	33.4375		31.6875
2022-06-01 19:35:00				34.5625
2022-06-01 19:45:00	33.375	34.9375	31.5
2022-06-01 20:05:00				34.5625
2022-06-01 20:15:00	33.375	34.9375	31.875
2022-06-01 20:35:00				34.75
2022-06-01 20:45:00	33.5	35.0625	32.1875
2022-06-01 20:55:00				34.625
2022-06-01 21:15:00	33.5	35.0625	32.5
2022-06-01 21:25:00				34.8125
2022-06-01 21:46:00	33.5625	35.125	32.125
2022-06-01 22:16:00	33.5625	34.875	32.375
2022-06-01 22:26:00				34.6875
2022-06-01 22:46:00	33.75	34.875	32.75
2022-06-01 22:56:00				34.625
2022-06-01 23:06:00		35
2022-06-01 23:16:00	33.6875		32.4375
2022-06-01 23:36:00		34.9375
2022-06-01 23:46:00	33.6875		32.4375
2022-06-01 23:56:00				34.625
2022-06-02 00:06:00		35
2022-06-02 00:16:00	33.6875		32.25
2022-06-02 00:36:00		34.9375
2022-06-02 00:46:00	33.625		32.5
2022-06-02 01:06:00		35.0625	32.625
2022-06-02 01:16:00	33.6875
2022-06-02 01:37:00	33.6875	34.9375	32.625
2022-06-02 01:47:00				34.625
2022-06-02 02:07:00	33.6875	35	32.4375
2022-06-02 02:37:00	33.625	34.875	32.125
2022-06-02 02:47:00				34.6875
2022-06-02 03:07:00	33.6875	34.875	32.375
2022-06-02 03:17:00				34.75
2022-06-02 03:38:00	33.75	34.8125	32.25
2022-06-02 03:48:00				34.5625
2022-06-02 04:08:00	33.625	34.9375	32.4375
2022-06-02 04:18:00				34.625
2022-06-02 04:28:00		34.9375
2022-06-02 04:38:00	33.625		31.8125
2022-06-02 04:48:00				34.5625
2022-06-02 04:58:00		35
2022-06-02 05:08:00	33.5625		32.3125
2022-06-02 05:18:00				34.6875
2022-06-02 05:28:00		35
2022-06-02 05:38:00	33.6875		32.4375
2022-06-02 05:48:00				34.6875
2022-06-02 05:58:00		35.0625
2022-06-02 06:08:00	33.5		32.375
2022-06-02 06:18:00				34.5625
2022-06-02 06:28:00		35.125
2022-06-02 06:38:00	33.625		32.5625
2022-06-02 06:48:00				34.5625
2022-06-02 06:58:00		35.1875	32.5
2022-06-02 07:08:00	33.5625
2022-06-02 07:18:00				34.6875
2022-06-02 07:28:00	33.625	35	32.8125
2022-06-02 07:38:00				34.6875
2022-06-02 07:58:00	33.6875	35.0625	32.75
2022-06-02 08:08:00				34.625
2022-06-02 08:28:00	33.75	35	32.6875
2022-06-02 08:38:00				34.75
2022-06-02 08:58:00	33.8125	35	33.0625
2022-06-02 09:08:00				34.6875
2022-06-02 09:28:00	33.8125	35.125	33.1875
2022-06-02 09:38:00				34.8125
2022-06-02 09:59:00	33.875	35.0625	33.25
2022-06-02 10:09:00				34.75
2022-06-02 10:29:00	33.875	35	33.1875
2022-06-02 10:39:00				34.8125
2022-06-02 10:59:00	33.875	34.9375	33.1875
2022-06-02 11:19:00		35
2022-06-02 11:29:00	33.9375		33.125
2022-06-02 11:39:00				34.625
2022-06-02 11:49:00		34.875
2022-06-02 11:59:00	33.8125		32.6875
2022-06-02 12:09:00				34.625
2022-06-02 12:19:00		34.875
2022-06-02 12:29:00	33.875		32.875
2022-06-02 12:39:00				34.9375
2022-06-02 12:49:00		34.6875	32.9375
2022-06-02 12:59:00	33.875			34.6875
2022-06-02 13:19:00	33.6875	34.625	33
2022-06-02 13:29:00				34.6875
2022-06-02 13:50:00	33.75	34.875	33.125
2022-06-02 14:00:00				34.5
2022-06-02 14:20:00	33.75	34.9375	33.125
2022-06-02 14:30:00				34.625
2022-06-02 14:50:00	33.75	34.875	33
2022-06-02 15:00:00				34.6875
2022-06-02 15:20:00	33.75	34.75	33.125
2022-06-02 15:30:00				34.875
2022-06-02 15:50:00	33.6875	34.625	33.0625
2022-06-02 16:00:00				34.8125
2022-06-02 16:20:00	33.625	34.75	33.125
2022-06-02 16:30:00				34.75
2022-06-02 16:40:00		34.875
2022-06-02 16:50:00	33.6875		32.875
2022-06-02 17:00:00				34.6875
2022-06-02 17:10:00		34.8125
2022-06-02 17:20:00	33.625		32.5
2022-06-02 17:30:00				34.625
2022-06-02 17:40:00		34.75
2022-06-02 17:50:00	33.5625		32.4375
2022-06-02 18:00:00				34.6875
2022-06-02 18:10:00		35	32.375
2022-06-02 18:20:00	33.5625
2022-06-02 18:30:00				34.625
2022-06-02 18:40:00		35.125	32.25
2022-06-02 18:50:00	33.6875
2022-06-02 19:00:00				34.625
2022-06-02 19:10:00	33.625	34.9375	32.125
2022-06-02 19:20:00				34.625
2022-06-02 19:41:00	33.625	34.8125	32.4375
2022-06-02 19:51:00				34.5625
2022-06-02 20:11:00	33.6875	34.9375	32.125
2022-06-02 20:21:00				34.75
2022-06-02 20:41:00	33.625	35.125	32.4375
2022-06-02 20:51:00				34.8125
2022-06-02 21:11:00	33.6875	34.9375	32.4375
2022-06-02 21:21:00				34.3125
2022-06-02 21:41:00	33.75	34.875	32.8125
2022-06-02 21:51:00				34.5625
2022-06-02 22:11:00	33.6875	34.9375	32.8125
2022-06-02 22:21:00				34.625
2022-06-02 22:31:00		34.8125
2022-06-02 22:41:00	33.6875		32.75
2022-06-02 22:51:00				34.625
2022-06-02 23:01:00		34.9375
2022-06-02 23:11:00	33.6875		33.125
2022-06-02 23:21:00				34.625
2022-06-02 23:31:00		34.8125
2022-06-02 23:41:00	33.6875		33.1875
2022-06-02 23:51:00				34.5625
2022-06-03 00:01:00		35	32.9375
2022-06-03 00:11:00	33.6875
2022-06-03 00:21:00				34.8125
2022-06-03 00:32:00	33.6875	35.0625	33.1875
2022-06-03 00:52:00				34.6875
2022-06-03 01:01:00	33.625	34.875	32.5625
2022-06-03 01:11:00				34.6875
2022-06-03 01:32:00	33.625	34.875	32.875
2022-06-03 01:42:00				34.5
2022-06-03 02:02:00	33.625	35.0625	32.875
2022-06-03 02:12:00				34.5625
2022-06-03 02:32:00	33.5625	34.9375	32.8125
2022-06-03 02:42:00				34.625
2022-06-03 03:02:00	33.5625	35.0625	32.875
2022-06-03 03:12:00				34.625
2022-06-03 03:32:00	33.5	34.875	32.625
2022-06-03 03:42:00				34.625
2022-06-03 04:02:00	33.625	34.9375	32.6875
2022-06-03 04:12:00				34.75
2022-06-03 04:33:00	33.6875	35.125	32.9375
2022-06-03 04:43:00				34.8125
2022-06-03 04:53:00		35
2022-06-03 05:03:00	33.4375		32.5625
2022-06-03 05:13:00				34.6875
2022-06-03 05:23:00		35.125
2022-06-03 05:33:00	33.5		32.75
2022-06-03 05:43:00				34.75
2022-06-03 05:53:00		35.0625	32.875
2022-06-03 06:03:00	33.625
2022-06-03 06:13:00				34.75
2022-06-03 06:23:00		35.0625	32.625
2022-06-03 06:33:00	33.625
2022-06-03 06:43:00				34.8125
2022-06-03 06:53:00	33.6875	34.9375	32.625
2022-06-03 07:13:00				34.8125
2022-06-03 07:23:00	33.5625	35.0625	32.625
2022-06-03 07:33:00				34.8125
2022-06-03 07:53:00	33.5	35	32.9375
2022-06-03 08:03:00				34.8125
2022-06-03 08:23:00	33.5625	35	32.9375
2022-06-03 08:33:00				34.9375
2022-06-03 08:53:00	33.75	35.1875	33
2022-06-03 09:03:00				34.9375
2022-06-03 09:23:00	33.8125	35.1875	33.25
2022-06-03 09:33:00				34.875
2022-06-03 09:54:00	33.875	35.125	33.1875
2022-06-03 10:04:00				35
2022-06-03 10:24:00	33.9375	35.1875	33.5625
2022-06-03 10:34:00				28.3125
2022-06-03 10:44:00		35.1875
2022-06-03 10:54:00	34.0625		33.625
2022-06-03 11:04:00				33.8125
2022-06-03 11:14:00		34.8125
2022-06-03 11:24:00	34.0625		33.3125
2022-06-03 11:34:00				34.4375
2022-06-03 11:44:00		34.75	33.25
2022-06-03 11:54:00	33.9375
2022-06-03 12:04:00				34.5625
2022-06-03 12:14:00		34.9375	33
2022-06-03 12:24:00	34
2022-06-03 12:34:00				34.1875
2022-06-03 12:44:00	34	34.8125	32.8125
2022-06-03 13:04:00				34.25
2022-06-03 13:14:00	34	34.5	32.4375
2022-06-03 13:24:00				34.3125
2022-06-03 13:44:00	33.8125	34.625	32.8125
2022-06-03 13:54:00				34.1875
2022-06-03 14:14:00	33.8125	34.8125	32.5625
2022-06-03 14:24:00				34.25
2022-06-03 14:44:00	33.8125	34.625	32.5625
2022-06-03 14:54:00				34.3125
2022-06-03 15:15:00	33.75	34.5625	32.5
2022-06-03 15:24:00				34.3125
2022-06-03 15:45:00	33.75	34.625	32.375
2022-06-03 15:55:00				34.375
2022-06-03 16:15:00	33.75	34.625	32.375
2022-06-03 16:25:00				34.375
2022-06-03 16:45:00	33.8125	34.5625	32.625
2022-06-03 16:55:00				34.25
2022-06-03 17:05:00		34.75	32.3125
2022-06-03 17:15:00	33.6875
2022-06-03 17:25:00				34.125
2022-06-03 17:35:00		34.8125	32.25
2022-06-03 17:45:00	33.6875
2022-06-03 17:55:00				34.25
2022-06-03 18:05:00		34.875	32.375
2022-06-03 18:15:00	33.6875
2022-06-03 18:25:00				34.3125
2022-06-03 18:35:00	33.75	34.8125	32
2022-06-03 18:55:00				34.3125
2022-06-03 19:05:00	33.75	35	32
2022-06-03 19:15:00				34.375
2022-06-03 19:35:00	33.6875	34.8125	32.1875
2022-06-03 19:45:00				34.625
2022-06-03 20:05:00	33.6875	34.875	32.5
2022-06-03 20:15:00				34.625
2022-06-03 20:36:00	33.6875	34.875	32.5625
2022-06-03 20:46:00				34.75
2022-06-03 21:06:00	33.6875	35	32.75
2022-06-03 21:16:00				34.6875
2022-06-03 21:36:00	33.875	34.75	32.5625
2022-06-03 21:46:00				34.9375
2022-06-03 22:06:00	33.8125	35	32.875
2022-06-03 22:16:00				34.9375
2022-06-03 22:36:00	33.8125	34.9375	33.0625
2022-06-03 22:46:00				34.6875
2022-06-03 22:56:00		34.75	33.125
2022-06-03 23:06:00	33.875
2022-06-03 23:16:00				34.625
2022-06-03 23:26:00		34.875	32.8125
2022-06-03 23:36:00	33.9375
2022-06-03 23:46:00				34.625
2022-06-03 23:56:00	33.8125	34.875	32.875
2022-06-04 00:16:00				34.5625
2022-06-04 00:26:00	33.8125	34.75	32.8125
2022-06-04 00:46:00				34.5
2022-06-04 00:56:00	33.8125	34.8125	32.4375
2022-06-04 01:06:00				34.625
2022-06-04 01:26:00	33.8125	35.0625	32.25
2022-06-04 01:36:00				34.625
2022-06-04 01:57:00	33.75	34.6875	32.625
2022-06-04 02:07:00				34.625
2022-06-04 02:27:00	33.8125	34.8125	32.625
2022-06-04 02:37:00				34.625
2022-06-04 02:57:00	33.75	34.8125	32.3125
2022-06-04 03:07:00				34.5625
2022-06-04 03:27:00	33.625	34.875	32.5625
2022-06-04 03:37:00				34.75
2022-06-04 03:57:00	33.8125	34.75	32.25
2022-06-04 04:07:00				34.6875
2022-06-04 04:17:00			32.125
2022-06-04 04:27:00	33.8125	34.8125
2022-06-04 04:37:00				34.6875
2022-06-04 04:47:00		34.9375	32.25
2022-06-04 04:57:00	33.8125
2022-06-04 05:07:00				34.6875
2022-06-04 05:17:00		34.875	32.375
2022-06-04 05:27:00	33.6875
2022-06-04 05:37:00				34.75
2022-06-04 05:47:00	33.625	34.875	31.9375
2022-06-04 06:08:00				34.625
2022-06-04 06:18:00	33.6875	34.8125	32.0625
2022-06-04 06:37:00				34.625
2022-06-04 06:47:00	33.6875	34.8125	32.125
2022-06-04 07:08:00				34.375
2022-06-04 07:18:00	33.6875	35.0625	32.4375
2022-06-04 07:37:00				34.25
2022-06-04 07:47:00	33.8125	35.3125	32.5625
2022-06-04 07:58:00				34.25
2022-06-04 08:18:00	34	35.1875	32.6875
2022-06-04 08:28:00				34.375
2022-06-04 08:48:00	34	35.125	32.9375
2022-06-04 08:58:00				34.3125
2022-06-04 09:18:00	34.0625	35	33.25
2022-06-04 09:28:00				34.4375
2022-06-04 09:48:00	34.1875	34.9375	33.5
2022-06-04 09:58:00				34.5625
2022-06-04 10:18:00	34.25	35.0625	33.5
2022-06-04 10:28:00				34.6875
2022-06-04 10:38:00			25.625
2022-06-04 10:48:00	34.3125	35.125
2022-06-04 10:58:00				34.75
2022-06-04 11:08:00		35.0625	29.625
2022-06-04 11:18:00	34.3125
2022-06-04 11:28:00				34.5625
2022-06-04 11:38:00		35	30.1875
2022-06-04 11:48:00	34.375
2022-06-04 11:58:00				34.625
2022-06-04 12:08:00		34.9375	31.0625
2022-06-04 12:18:00	34.4375
2022-06-04 12:28:00				34.375
2022-06-04 12:38:00	34.375	35.125	30.3125
2022-06-04 12:59:00				34.25
2022-06-04 13:09:00	34.4375	35.25	31.75
2022-06-04 13:29:00				34.25
2022-06-04 13:39:00	34.4375	35.125	33.0625
2022-06-04 13:59:00				34.25
2022-06-04 14:09:00	34.4375	35.3125	33.625
2022-06-04 14:19:00				34.375
2022-06-04 14:39:00	34.5625	35	33.5625
2022-06-04 14:49:00				34.625
2022-06-04 15:09:00	34.5	34.875	32.3125
2022-06-04 15:19:00				34.6875
2022-06-04 15:39:00	34.5	35.125	32.3125
2022-06-04 15:49:00				34.8125
2022-06-04 16:09:00	34.5	35.0625	31.75
2022-06-04 16:19:00				34.875
2022-06-04 16:39:00			31
2022-06-04 16:40:00	34.4375	35
2022-06-04 16:49:00				34.875
2022-06-04 16:59:00			31.125
2022-06-04 17:09:00	34.3125	34.875
2022-06-04 17:19:00				34.8125
2022-06-04 17:29:00		34.9375	31.125
2022-06-04 17:39:00	34.3125
2022-06-04 17:49:00				34.8125
2022-06-04 17:59:00		34.8125	30.8125
2022-06-04 18:10:00	34.375
2022-06-04 18:19:00				35
2022-06-04 18:29:00	34.3125	34.75	28.6875
2022-06-04 18:50:00				34.875
2022-06-04 19:00:00	34.25	34.875	26.6875
2022-06-04 19:20:00				34.8125
2022-06-04 19:30:00	34.25	34.8125	25.25
2022-06-04 19:50:00				34.875
2022-06-04 20:00:00	34.3125	34.875	24.5
2022-06-04 20:10:00				34.875
2022-06-04 20:30:00	34.375	35.0625	23.3125
2022-06-04 20:40:00				34.9375
2022-06-04 21:00:00	34.375	35	22.75
2022-06-04 21:10:00				35
2022-06-04 21:30:00	34.4375	35.0625	22.0625
2022-06-04 21:40:00				35.125
2022-06-04 21:50:00			21.875
2022-06-04 22:00:00	34.5	35
2022-06-04 22:10:00				35.1875
2022-06-04 22:20:00			21.5625
2022-06-04 22:30:00	34.5	35.125
2022-06-04 22:40:00				35.1875
2022-06-04 22:50:00			21.4375
2022-06-04 23:00:00	34.625	35
2022-06-04 23:10:00				35.125
2022-06-04 23:20:00		34.875	21.125
2022-06-04 23:30:00	34.625
2022-06-04 23:40:00				35.125
2022-06-04 23:50:00	34.625	35.0625	20.5625
2022-06-05 00:11:00				35.125
2022-06-05 00:21:00	34.6875	35	20.125
2022-06-05 00:41:00				35.125
2022-06-05 00:51:00	34.5625	34.9375	20.125
2022-06-05 01:11:00				35.1875
2022-06-05 01:21:00	34.5	34.9375	19.9375
2022-06-05 01:41:00				35.0625
2022-06-05 01:51:00	34.4375	35	19.9375
2022-06-05 02:01:00				35
2022-06-05 02:21:00	34.4375	34.9375	19.5
2022-06-05 02:31:00				34.9375
2022-06-05 02:51:00	34.375	34.8125	19.375
2022-06-05 03:01:00				35
2022-06-05 03:21:00	34.3125	35.0625	19
2022-06-05 03:31:00				34.9375
2022-06-05 03:41:00			19.0625
2022-06-05 03:51:00	34.25	35
2022-06-05 04:01:00				34.8125
2022-06-05 04:11:00			19.5625
2022-06-05 04:21:00	34.125	35.125
2022-06-05 04:31:00				34.875
2022-06-05 04:41:00			20.25
2022-06-05 04:51:00	34.1875	35
2022-06-05 05:01:00				34.6875
2022-06-05 05:11:00		35.1875	21.5625
2022-06-05 05:21:00	34.25
2022-06-05 05:32:00				34.6875
2022-06-05 05:41:00		35.4375	22.875
2022-06-05 05:51:00	34.3125
2022-06-05 06:01:00				34.75
2022-06-05 06:11:00	34.5	35.3125	24.4375
2022-06-05 06:32:00				34.5
2022-06-05 06:42:00	34.5	35.5	25.4375
2022-06-05 07:02:00				34.5
2022-06-05 07:12:00	34.5625	35.375	26.75
2022-06-05 07:32:00				34.625
2022-06-05 07:42:00	34.5625	35.25	28.125
2022-06-05 08:02:00				34.6875
2022-06-05 08:12:00	34.5625	35.1875	29.4375
2022-06-05 08:32:00				34.75
2022-06-05 08:42:00	34.75	35.1875	30.6875
2022-06-05 08:52:00				34.8125
2022-06-05 09:12:00	34.6875	35.1875	31.0625
2022-06-05 09:22:00				34.875
2022-06-05 09:43:00	34.75	35.1875	31.6875
2022-06-05 09:53:00				34.9375
2022-06-05 10:03:00			32.25
2022-06-05 10:13:00	34.8125	35.3125
2022-06-05 10:22:00				35
2022-06-05 10:32:00			32.375
2022-06-05 10:43:00	34.875	35.0625
2022-06-05 10:52:00				34.9375
2022-06-05 11:03:00			32.5
2022-06-05 11:13:00	34.9375	35.125
2022-06-05 11:23:00				34.625
2022-06-05 11:33:00			32.3125
2022-06-05 11:43:00	35	35.1875
2022-06-05 11:53:00				34.5625
2022-06-05 12:03:00		35.25	32.875
2022-06-05 12:13:00	34.9375
2022-06-05 12:23:00				34.4375
2022-06-05 12:33:00	34.9375	35.25	33.1875
2022-06-05 12:53:00				34.5625
2022-06-05 13:03:00	34.875	35.125	33
2022-06-05 13:23:00				34.4375
2022-06-05 13:33:00	34.75	35	33.75
2022-06-05 13:53:00				34.5
2022-06-05 14:03:00	34.875	34.9375	34.5625
2022-06-05 14:23:00				34.5
2022-06-05 14:33:00	34.8125	35	34.5
2022-06-05 14:53:00				34.6875
2022-06-05 15:03:00	34.75	35.125	34.875
2022-06-05 15:13:00				34.625
2022-06-05 15:34:00	34.6875	35.125	34.1875
2022-06-05 15:44:00				34.625
2022-06-05 16:04:00	34.6875	35	34.375
2022-06-05 16:14:00				34.75
2022-06-05 16:24:00			34.125
2022-06-05 16:34:00	34.6875	34.75
2022-06-05 16:44:00				34.6875
2022-06-05 16:54:00			33.8125
2022-06-05 17:04:00	34.5625	34.8125
2022-06-05 17:14:00				34.75
2022-06-05 17:24:00			33.375
2022-06-05 17:34:00	34.4375	34.6875
2022-06-05 17:44:00				34.4375
2022-06-05 17:54:00		34.8125	32.8125
2022-06-05 18:04:00	34.4375
2022-06-05 18:14:00				34.5
2022-06-05 18:24:00	34.3125	34.625	30.875
2022-06-05 18:44:00				34.4375
2022-06-05 18:54:00	34.3125	34.625	29.0625
2022-06-05 19:14:00				34.5
2022-06-05 19:24:00	34.25	34.5625	27.75
2022-06-05 19:44:00				34.4375
2022-06-05 19:54:00	34.125	34.625	26.8125
2022-06-05 20:14:00				34.5
2022-06-05 20:24:00	34.125	34.75	25.4375
2022-06-05 20:45:00				34.5625
2022-06-05 20:55:00	34.3125	34.9375	24.875
2022-06-05 21:05:00				34.8125
2022-06-05 21:25:00	34.4375	34.8125	24.8125
2022-06-05 21:35:00				35
2022-06-05 21:45:00			24.5
2022-06-05 21:55:00	34.5	34.75
2022-06-05 22:05:00				35.125
2022-06-05 22:15:00			24.125
2022-06-05 22:25:00	34.5625	34.75
2022-06-05 22:35:00				35.25
2022-06-05 22:45:00			24.625
2022-06-05 22:55:00	34.6875	34.75
2022-06-05 23:05:00				35.0625
2022-06-05 23:15:00			23.5625
2022-06-05 23:25:00	34.6875	35
2022-06-05 23:35:00				35
2022-06-05 23:45:00	34.5625	34.9375	23.6875
2022-06-06 00:05:00				34.9375
2022-06-06 00:15:00	34.6875	34.8125	23.3125
2022-06-06 00:35:00				35
2022-06-06 00:45:00	34.6875	34.8125	22.625
2022-06-06 01:05:00				34.875
2022-06-06 01:15:00	34.5625	34.8125	22.125
2022-06-06 01:35:00				34.875
2022-06-06 01:45:00			22
2022-06-06 01:46:00	34.5	34.8125
2022-06-06 02:06:00				34.75
2022-06-06 02:16:00	34.5	34.875	21.625
2022-06-06 02:36:00			21.1875	34.6875
2022-06-06 02:46:00	34.375	34.6875
2022-06-06 02:56:00				34.5
2022-06-06 03:06:00			21.25
2022-06-06 03:16:00	34.4375	34.625
2022-06-06 03:26:00				34.4375
2022-06-06 03:36:00			21
2022-06-06 03:46:00	34.3125	34.75
2022-06-06 03:56:00				34.25
2022-06-06 04:06:00			21.125
2022-06-06 04:16:00	34.375	34.6875
2022-06-06 04:26:00				34.625
2022-06-06 04:36:00			21.4375
2022-06-06 04:46:00	34.3125	34.875
2022-06-06 04:56:00				34.5
2022-06-06 05:06:00			23.1875
2022-06-06 05:16:00	34.4375	34.875
2022-06-06 05:26:00				34.5625
2022-06-06 05:36:00	34.5		24.125
2022-06-06 05:46:00		35.125
2022-06-06 05:56:00				34.5
2022-06-06 06:06:00	34.5625	35.1875	25.5
2022-06-06 06:26:00				34.625
2022-06-06 06:36:00	34.5625	35.1875	26.625
2022-06-06 06:56:00				34.625
2022-06-06 07:06:00	34.6875	35.4375	28.375
2022-06-06 07:26:00				34.6875
2022-06-06 07:36:00	34.75	35.375	29.125
2022-06-06 07:57:00				34.6875
2022-06-06 08:07:00	34.75	35.0625	30.1875
2022-06-06 08:27:00				34.75
2022-06-06 08:37:00	34.75	35.125	31.5625
2022-06-06 08:57:00				34.75
2022-06-06 09:07:00	34.75	35.1875	33
2022-06-06 09:27:00			33.625	34.875
2022-06-06 09:37:00	34.8125
2022-06-06 09:47:00				34.75
2022-06-06 09:57:00			33.9375
2022-06-06 10:07:00	34.8125	35
2022-06-06 10:17:00				34.75
2022-06-06 10:27:00			33.75
2022-06-06 10:37:00	34.6875	34.9375
2022-06-06 10:47:00				34.5
2022-06-06 10:57:00			33.625
2022-06-06 11:07:00	34.75	35
2022-06-06 11:17:00				34.5625
2022-06-06 11:27:00			33.9375
2022-06-06 11:37:00	34.75	35.25
2022-06-06 11:47:00				34.625
2022-06-06 11:57:00	34.75		34.375
2022-06-06 12:07:00		35
2022-06-06 12:17:00				34.4375
2022-06-06 12:27:00	34.6875	35.125	33.875
2022-06-06 12:47:00				34.25
2022-06-06 12:57:00	34.625	35.0625	33.8125
2022-06-06 13:18:00				34.3125
2022-06-06 13:27:00	34.75	35.0625	34.375
2022-06-06 13:48:00				34.3125
2022-06-06 13:58:00	34.625	35.0625	33.375
2022-06-06 14:18:00				34.375
2022-06-06 14:28:00	34.5625	35.125	32.6875
2022-06-06 14:48:00				34.4375
2022-06-06 14:58:00	34.5625	35.0625	31.1875
2022-06-06 15:18:00			30.4375	34.375
2022-06-06 15:28:00	34.5625	34.9375
2022-06-06 15:48:00			30.375	34.3125
2022-06-06 15:58:00	34.4375	34.8125
2022-06-06 16:08:00				34.3125
2022-06-06 16:18:00			30.25
2022-06-06 16:28:00	34.4375	34.6875
2022-06-06 16:38:00				34.4375
2022-06-06 16:48:00			31.1875
2022-06-06 16:58:00	34.3125	34.5625
2022-06-06 17:08:00				34.5
2022-06-06 17:18:00			30.6875
2022-06-06 17:28:00	34.3125	34.625
2022-06-06 17:38:00				34.375
2022-06-06 17:48:00	34.25		29.75
2022-06-06 17:58:00		34.4375
2022-06-06 18:08:00				34.3125
2022-06-06 18:18:00	34.125	34.5625	28.6875
2022-06-06 18:39:00				34.375
2022-06-06 18:49:00	34.0625	34.5	27.9375
2022-06-06 19:09:00				34.3125
2022-06-06 19:19:00	34.125	34.375	26.75
2022-06-06 19:39:00				34.25
2022-06-06 19:49:00	34	34.4375	25.8125
2022-06-06 20:09:00				34.1875
2022-06-06 20:19:00	33.9375	34.5625	25.0625
2022-06-06 20:39:00			24.25	34.3125
2022-06-06 20:49:00	34	34.8125
2022-06-06 21:09:00			23.625	34.5625
2022-06-06 21:19:00	34.125	34.6875
2022-06-06 21:40:00			23.3125	34.5625
2022-06-06 21:50:00	34.25	34.625
2022-06-06 22:00:00				34.5625
2022-06-06 22:10:00			22.8125
2022-06-06 22:20:00	34.4375	34.5625
2022-06-06 22:30:00				34.6875
2022-06-06 22:40:00			22.3125
2022-06-06 22:50:00	34.6875	34.5
2022-06-06 23:00:00				34.6875
2022-06-06 23:10:00			22.25
2022-06-06 23:20:00	34.5625	34.5
2022-06-06 23:30:00				34.625
2022-06-06 23:40:00	34.625		21.8125
2022-06-06 23:50:00		34.5625
2022-06-07				34.625
2022-06-07 00:10:00	34.6875	34.5625	21.8125
2022-06-07 00:30:00				34.75
2022-06-07 00:40:00	34.625	34.625	23.75
2022-06-07 01:00:00				34.6875
2022-06-07 01:10:00	34.6875	34.5625	23
2022-06-07 01:30:00				34.4375
2022-06-07 01:40:00	34.625	34.5625	22.1875
2022-06-07 02:00:00			21.875	34.5
2022-06-07 02:10:00	34.75	34.5
2022-06-07 02:30:00				34.5
2022-06-07 02:31:00			21.6875
2022-06-07 02:40:00	34.8125	34.5
2022-06-07 03:01:00			22.625	34.375
2022-06-07 03:11:00	34.875	34.75
2022-06-07 03:31:00			22.0625	34.4375
2022-06-07 03:41:00	34.8125	34.75
2022-06-07 03:51:00				34.375
2022-06-07 04:01:00			21.9375
2022-06-07 04:11:00	34.8125	34.625
2022-06-07 04:21:00				34.25
2022-06-07 04:31:00			22.0625
2022-06-07 04:41:00	34.8125	34.8125
2022-06-07 04:51:00				34.375
2022-06-07 05:01:00			23.1875
2022-06-07 05:11:00	34.875	35
2022-06-07 05:21:00				34.25
2022-06-07 05:31:00	34.8125		24
2022-06-07 05:41:00		35.125
2022-06-07 05:51:00				34.375
2022-06-07 06:01:00	34.8125	34.875	25.0625
2022-06-07 06:21:00				34.4375
2022-06-07 06:31:00	34.875	35.0625	26.375
2022-06-07 06:51:00				34.4375
2022-06-07 07:01:00	34.8125	35.25	27.375
2022-06-07 07:21:00				34.5
2022-06-07 07:31:00	34.875	35.4375	28.0625
2022-06-07 07:52:00				34.625
2022-06-07 08:02:00	34.875	35.4375	29.375
2022-06-07 08:22:00			30.875	34.5625
2022-06-07 08:32:00	34.875	35.3125
2022-06-07 08:52:00			32.5625	34.6875
2022-06-07 09:02:00	34.8125	34.9375
2022-06-07 09:22:00			33.625	34.625
2022-06-07 09:32:00	34.6875	35.125
2022-06-07 09:52:00			33.6875	34.625
2022-06-07 10:02:00	34.6875	35.125
2022-06-07 10:23:00			33.5625	34.625
2022-06-07 10:33:00	34.75	35.125
2022-06-07 10:42:00				34.5
2022-06-07 10:52:00			33.4375
2022-06-07 11:02:00	34.625	34.875
2022-06-07 11:12:00				34.5
2022-06-07 11:22:00	34.875		32.25
2022-06-07 11:32:00		34.8125
2022-06-07 11:42:00				34.4375
2022-06-07 11:52:00	34.5625		30.9375
2022-06-07 12:03:00		34.8125
2022-06-07 12:12:00				34.375
2022-06-07 12:23:00	34.5625	34.875	30.1875
2022-06-07 12:43:00				34.375
2022-06-07 12:53:00	34.5	34.75	30.125
2022-06-07 13:13:00				34.3125
2022-06-07 13:23:00	34.5625	34.875	30.1875
2022-06-07 13:43:00				34.1875
2022-06-07 13:53:00	34.5	34.875	30.6875
2022-06-07 14:13:00			31.625	34.25
2022-06-07 14:23:00	34.4375	35
2022-06-07 14:43:00			33.125	34.4375
2022-06-07 14:53:00	34.5	34.9375
2022-06-07 15:13:00				34.25
2022-06-07 15:14:00			31.5
2022-06-07 15:23:00	34.375	35
2022-06-07 15:44:00			30.3125	34.25
2022-06-07 15:54:00	34.4375	34.8125
2022-06-07 16:14:00			29.1875	34.25
2022-06-07 16:24:00	34.375	34.8125
2022-06-07 16:34:00				34.25
2022-06-07 16:44:00			28.5625
2022-06-07 16:54:00	34.375	34.625
2022-06-07 17:04:00				34.1875
2022-06-07 17:14:00	34.375		27.8125
2022-06-07 17:24:00		34.5
2022-06-07 17:34:00				34.0625
2022-06-07 17:44:00	34.5		27
2022-06-07 17:54:00		34.4375
2022-06-07 18:04:00				34.125
2022-06-07 18:14:00	34.4375	34.5	26.125
2022-06-07 18:34:00				34.1875
2022-06-07 18:44:00	34.5	34.5	25.5625
2022-06-07 19:04:00				34.0625
2022-06-07 19:14:00	34.5625	34.5	24.9375
2022-06-07 19:34:00			24.5	34.25
2022-06-07 19:44:00	34.625	34.4375
2022-06-07 20:05:00			23.8125	34.3125
2022-06-07 20:15:00	34.625	34.5
2022-06-07 20:35:00			23.1875	34.4375
2022-06-07 20:45:00	34.75	34.625
2022-06-07 21:05:00			23.375	34.4375
2022-06-07 21:15:00	34.8125	34.375
2022-06-07 21:35:00			23.1875	34.5
2022-06-07 21:45:00	35.0625	34.3125
2022-06-07 21:55:00				34.625
2022-06-07 22:05:00			23.625
2022-06-07 22:15:00	34.9375	34.4375
2022-06-07 22:25:00				34.75
2022-06-07 22:35:00	35		23.125
2022-06-07 22:45:00		34.375
2022-06-07 22:55:00				34.6875
2022-06-07 23:05:00	35.125		23.0625
2022-06-07 23:15:00		34.5
2022-06-07 23:25:00				34.6875
2022-06-07 23:35:00	34.9375		23
2022-06-07 23:45:00		34.4375
2022-06-07 23:55:00				34.75
2022-06-08 00:05:00	34.9375	34.625	23.5625
2022-06-08 00:25:00				34.75
2022-06-08 00:35:00	34.875	34.5625	23.8125
2022-06-08 00:55:00			24.1875	34.625
2022-06-08 01:05:00	34.875	34.5625
2022-06-08 01:26:00			23.3125	34.625
2022-06-08 01:36:00	34.875	34.5625
2022-06-08 01:56:00			23.8125	34.3125
2022-06-08 02:06:00	34.8125	34.5
2022-06-08 02:26:00			23.125	34.25
2022-06-08 02:36:00	34.875	34.3125
2022-06-08 02:56:00			23	34.375
2022-06-08 03:06:00	34.8125	34.5
2022-06-08 03:26:00			22.625	34.5
2022-06-08 03:36:00	34.8125	34.5625
2022-06-08 03:56:00				34.3125
2022-06-08 03:57:00			22.6875
2022-06-08 04:06:00	34.9375	34.3125
2022-06-08 04:16:00				34.3125
2022-06-08 04:27:00	34.875		23.1875
2022-06-08 04:36:00		34.5625
2022-06-08 04:46:00				34.4375
2022-06-08 04:57:00	34.8125		23.25
2022-06-08 05:06:00		34.625
2022-06-08 05:17:00				34.375
2022-06-08 05:27:00	34.75		23.125
2022-06-08 05:37:00		34.5
2022-06-08 05:47:00				34.25
2022-06-08 05:57:00	34.8125	34.375	23.1875
2022-06-08 06:17:00				34.375
2022-06-08 06:27:00	34.8125	34.5	23.4375
2022-06-08 06:47:00			23.625	34.0625
2022-06-08 06:57:00	34.75	34.625
2022-06-08 07:17:00			24.375	34
2022-06-08 07:27:00	34.75	34.4375
2022-06-08 07:47:00			24.875	34.1875
2022-06-08 07:57:00	34.8125	34.5
2022-06-08 08:17:00			25.375	34.25
2022-06-08 08:27:00	34.8125	34.5625
2022-06-08 08:48:00			26.25	34.25
2022-06-08 08:58:00	34.6875	34.5625
2022-06-08 09:18:00			26.4375	34.25
2022-06-08 09:28:00	34.6875	34.625
2022-06-08 09:48:00			26.5625	34.1875
2022-06-08 09:58:00	34.5625	34.5625
2022-06-08 10:08:00				34.25
2022-06-08 10:18:00	34.5625		26.625
2022-06-08 10:28:00		34.5625
2022-06-08 10:38:00				34.25
2022-06-08 10:48:00	34.5		26.5625
2022-06-08 10:58:00		34.5
2022-06-08 11:08:00				34.125
2022-06-08 11:18:00	34.4375		26.6875
2022-06-08 11:28:00		34.375
2022-06-08 11:38:00				34.25
2022-06-08 11:48:00	34.5625	34.4375	26.6875
2022-06-08 12:08:00			27.0625	34.0625
2022-06-08 12:18:00	34.375	34.5625
2022-06-08 12:38:00			28.125	34.1875
2022-06-08 12:48:00	34.375	34.6875
2022-06-08 13:09:00			28.375	34.0625
2022-06-08 13:18:00	34.25
2022-06-08 13:19:00		34.5625
2022-06-08 13:39:00			29.0625	34.1875
2022-06-08 13:49:00	34.5	34.6875
2022-06-08 14:09:00			29.6875	34.125
2022-06-08 14:19:00	34.375	34.4375
2022-06-08 14:39:00			29.75	34.375
2022-06-08 14:49:00	34.5	34.1875
2022-06-08 15:09:00			29.25	34.25
2022-06-08 15:19:00	34.3125	34.3125
2022-06-08 15:39:00	34.375		29.5	34.1875
2022-06-08 15:49:00		34.375
2022-06-08 16:09:00	34.25		29.1875	34.3125
2022-06-08 16:19:00		34.3125
2022-06-08 16:29:00				34.25
2022-06-08 16:39:00	34.4375		29.1875
2022-06-08 16:50:00		34.1875
2022-06-08 16:59:00				34.3125
2022-06-08 17:09:00	34.4375		28.625
2022-06-08 17:20:00		34.1875
2022-06-08 17:29:00				34.1875
2022-06-08 17:40:00	34.3125	34.4375	28.125
2022-06-08 18:00:00			28.375	34.25
2022-06-08 18:10:00	34.4375	34.4375
2022-06-08 18:30:00			28.1875	34.25
2022-06-08 18:40:00	34.5	34.4375
2022-06-08 19:00:00			27.875	34.3125
2022-06-08 19:10:00	34.375	34.5
2022-06-08 19:30:00			27.25	34.375
2022-06-08 19:40:00	34.4375	34.5
2022-06-08 20:00:00			27.1875	34.4375
2022-06-08 20:10:00	34.4375	34.625
2022-06-08 20:31:00			26.25	34.5625
2022-06-08 20:41:00	34.5	34.5625
2022-06-08 21:01:00			25.75	34.8125
2022-06-08 21:11:00	34.5625	34.5
2022-06-08 21:31:00	34.5		25.625	34.8125
2022-06-08 21:41:00		34.75
2022-06-08 21:51:00				34.875
2022-06-08 22:01:00	34.625		25.9375
2022-06-08 22:11:00		34.75
2022-06-08 22:21:00				35
2022-06-08 22:31:00	34.6875		25.625
2022-06-08 22:41:00		34.75
2022-06-08 22:51:00				34.9375
2022-06-08 23:01:00	34.6875		26
2022-06-08 23:11:00		34.6875
2022-06-08 23:21:00			25.4375	35
2022-06-08 23:31:00	34.75	34.6875
2022-06-08 23:51:00			26	35
2022-06-09 00:01:00	34.8125	34.75
2022-06-09 00:21:00			25.9375	34.875
2022-06-09 00:31:00	34.6875	34.4375
2022-06-09 00:51:00			25.1875	34.875
2022-06-09 01:01:00	34.625	34.75
2022-06-09 01:22:00			24.8125	34.8125
2022-06-09 01:32:00	34.625	34.8125
2022-06-09 01:52:00			24.4375	34.6875
2022-06-09 02:02:00	34.6875	34.4375
2022-06-09 02:22:00			24.3125	34.6875
2022-06-09 02:32:00	34.5625	34.625
2022-06-09 02:52:00	34.625		23.375	34.625
2022-06-09 03:02:00		34.5
2022-06-09 03:22:00	34.625		23.5	34.4375
2022-06-09 03:32:00		34.75
2022-06-09 03:42:00				34.4375
2022-06-09 03:52:00	34.5625		23.6875
2022-06-09 04:02:00		34.5625
2022-06-09 04:22:00	34.5625		23.25
2022-06-09 04:32:00		34.6875
2022-06-09 04:42:00			23.5	34.4375
2022-06-09 04:52:00	34.5625	34.625
2022-06-09 05:12:00			24.4375	34.4375
2022-06-09 05:22:00	34.6875
2022-06-09 05:23:00		34.75
2022-06-09 05:43:00			24.875	34.375
2022-06-09 05:53:00	34.625	34.875
2022-06-09 06:13:00			25.6875	34.375
2022-06-09 06:23:00	34.625	34.8125
2022-06-09 06:43:00			26.5625	34.4375
2022-06-09 06:53:00	34.5	34.9375
2022-06-09 07:13:00			27.875	34.375
2022-06-09 07:23:00	34.5625	34.75
2022-06-09 07:43:00				34.4375
2022-06-09 07:44:00			28.125
2022-06-09 07:53:00	34.625	34.8125
2022-06-09 08:14:00			28.8125	34.3125
2022-06-09 08:24:00	34.4375	34.875
2022-06-09 08:44:00			30.25	34.5
2022-06-09 08:54:00	34.5	34.875
2022-06-09 09:14:00	34.5625		31.9375	34.625
2022-06-09 09:24:00		35.125
2022-06-09 09:44:00	34.5		33.5625	34.875
2022-06-09 09:54:00		34.875
2022-06-09 10:04:00				34.875
2022-06-09 10:14:00	34.5625		34.125
2022-06-09 10:24:00		35.125
2022-06-09 10:34:00			34.5	34.8125
2022-06-09 10:44:00	34.6875
2022-06-09 10:54:00		35
2022-06-09 11:04:00			34.6875	34.6875
2022-06-09 11:14:00	34.75	35
2022-06-09 11:34:00			34.75
2022-06-09 11:44:00	34.75	35.125
2022-06-09 12:04:00			34.625	34.4375
2022-06-09 12:14:00	34.6875	35.1875
2022-06-09 12:35:00			34.875	34.3125
2022-06-09 12:45:00	34.625	35.125
2022-06-09 13:05:00			35.1875	34.5625
2022-06-09 13:15:00	34.6875	35
2022-06-09 13:35:00			35.4375	34.4375
2022-06-09 13:45:00	34.6875	34.875
2022-06-09 14:05:00			34.4375	34.375
2022-06-09 14:15:00	34.5625	34
2022-06-09 14:35:00			35.0625	33.875
2022-06-09 14:45:00	34.75	34.4375
2022-06-09 15:06:00	35		35.5	33.9375
2022-06-09 15:15:00		34.25
2022-06-09 15:36:00	35.0625		35.625	34.0625
2022-06-09 15:46:00		34.0625
2022-06-09 16:06:00	35.125		35.6875	34.125
2022-06-09 16:16:00		33.75
2022-06-09 16:26:00			35.5625	33.9375
2022-06-09 16:36:00	35.1875
2022-06-09 16:46:00		33.4375
2022-06-09 16:56:00			35.4375	33.6875
2022-06-09 17:06:00	35.1875	33.4375
2022-06-09 17:26:00			35.25	33.6875
2022-06-09 17:36:00	35.125	33.125
2022-06-09 17:56:00			35.125	33.9375
2022-06-09 18:06:00	35.0625	33
2022-06-09 18:26:00			34.8125	34
2022-06-09 18:36:00	34.9375	32.625
2022-06-09 18:57:00			34.6875	33.875
2022-06-09 19:07:00	34.9375	32.3125
2022-06-09 19:27:00			34.625	34.125
2022-06-09 19:37:00	34.9375	31.75
2022-06-09 19:57:00			34.625	34.0625
2022-06-09 20:07:00	35	31.1875
2022-06-09 20:27:00	35.0625		34.6875	34.3125
2022-06-09 20:37:00		31.3125
2022-06-09 20:57:00	35.0625		34.625	34.1875
2022-06-09 21:07:00		31.3125
2022-06-09 21:27:00	35.25		34.75	34.375
2022-06-09 21:37:00		31.625
2022-06-09 21:47:00			34.4375	34.1875
2022-06-09 21:57:00	35.25
2022-06-09 22:07:00		31.875
2022-06-09 22:17:00			34.5625	34.1875
2022-06-09 22:27:00	35.25	31.9375
2022-06-09 22:48:00			34.625	34.25
2022-06-09 22:58:00	35.25	31.875
2022-06-09 23:18:00			34.625	34.375
2022-06-09 23:28:00	35.1875	31.5625
2022-06-09 23:48:00			34.75	34.5
2022-06-09 23:58:00	35	31.5625
2022-06-10 00:18:00			34.625	34.3125
2022-06-10 00:28:00	35.125	31.4375
2022-06-10 00:48:00			34.375	34.375
2022-06-10 00:58:00	35.125	31.25
2022-06-10 01:18:00			34.3125	34.375
2022-06-10 01:28:00	34.9375	30.9375
2022-06-10 01:49:00	35.0625		34.3125	34
2022-06-10 01:59:00		30.75
2022-06-10 02:19:00	35		34	34.125
2022-06-10 02:29:00		30.875
2022-06-10 02:49:00	35.0625		33.5	34.0625
2022-06-10 02:59:00		30.625
2022-06-10 03:09:00			33.8125
2022-06-10 03:19:00	35			34
2022-06-10 03:29:00		30.1875
2022-06-10 03:39:00			33.8125	33.875
2022-06-10 03:49:00	35
2022-06-10 03:59:00		30.625
2022-06-10 04:09:00			33.625	33.9375
2022-06-10 04:19:00	35	31.0625
2022-06-10 04:39:00			33.8125
2022-06-10 04:49:00	35.0625	31.0625
2022-06-10 05:09:00			33.8125	34
2022-06-10 05:19:00	35.0625	31.625
2022-06-10 05:39:00			34.0625
2022-06-10 05:49:00	35.0625	32.1875
2022-06-10 06:10:00			34.125	34
2022-06-10 06:20:00	35	32.875
2022-06-10 06:40:00			34.4375
2022-06-10 06:50:00	35.0625	33.3125
2022-06-10 07:10:00			34.375
2022-06-10 07:20:00	35.125	33.75
2022-06-10 07:40:00			34.6875	34.1875
2022-06-10 07:50:00	35.0625	33.875
2022-06-10 08:10:00	35.0625		34.8125	34
2022-06-10 08:20:00		34
2022-06-10 08:40:00			34.6875
2022-06-10 08:41:00	35.1875
2022-06-10 08:51:00		34.125
2022-06-10 09:01:00			34.6875
2022-06-10 09:10:00	35.0625
2022-06-10 09:21:00		34.0625
2022-06-10 09:31:00			35
2022-06-10 09:41:00	35.0625
2022-06-10 09:51:00		34.1875
2022-06-10 10:01:00			34.875
2022-06-10 10:11:00	35.0625
2022-06-10 10:21:00		34.3125
2022-06-10 10:31:00			34.625
2022-06-10 10:41:00	35.0625	33.9375
2022-06-10 11:01:00			34.5	34.25
2022-06-10 11:11:00	35.0625	33.875
2022-06-10 11:31:00			34.375	34.1875
2022-06-10 11:41:00	35	33.875
2022-06-10 12:01:00			34.375	34.1875
2022-06-10 12:11:00	35	33.75
2022-06-10 12:31:00			34.25	34.1875
2022-06-10 12:41:00	35	33.5
2022-06-10 13:02:00			34.25	34.3125
2022-06-10 13:11:00	35	32.5
2022-06-10 13:32:00	34.9375		34.1875	34.125
2022-06-10 13:42:00		31.4375
2022-06-10 13:52:00				34.0625
2022-06-10 14:02:00	34.875		33.5625
2022-06-10 14:12:00		31.1875
2022-06-10 14:22:00			33.6875
2022-06-10 14:32:00	34.8125
2022-06-10 14:42:00		30.75
2022-06-10 14:52:00			33.8125
2022-06-10 15:02:00	34.8125
2022-06-10 15:12:00		31.25
2022-06-10 15:22:00			33.75	33.9375
2022-06-10 15:32:00	34.8125
2022-06-10 15:42:00		30.9375
2022-06-10 15:52:00			33.8125	33.9375
2022-06-10 16:02:00	34.875
2022-06-10 16:12:00		30.25
2022-06-10 16:22:00			33.6875	33.875
2022-06-10 16:32:00	34.875	30.5
2022-06-10 16:52:00			33.9375	33.625
2022-06-10 17:02:00	34.875	30.625
2022-06-10 17:22:00			33.9375	33.5
2022-06-10 17:32:00	34.625	30.6875
2022-06-10 17:52:00			34	33.5625
2022-06-10 18:02:00	34.625	31
2022-06-10 18:22:00			33.9375	33.625
2022-06-10 18:32:00	34.6875	31
2022-06-10 18:52:00			34	33.875
2022-06-10 19:02:00	34.75	31.4375
2022-06-10 19:23:00	34.6875		34.0625	33.8125
2022-06-10 19:33:00		31.4375
2022-06-10 19:43:00				33.875
2022-06-10 19:53:00	34.75		34.125
2022-06-10 20:03:00		31.5
2022-06-10 20:13:00			34.0625	34.125
2022-06-10 20:23:00	34.75
2022-06-10 20:33:00		31.5
2022-06-10 20:43:00			34	34.1875
2022-06-10 20:53:00	34.6875
2022-06-10 21:03:00		31.5625
2022-06-10 21:13:00			34.0625	34.625
2022-06-10 21:23:00	34.8125
2022-06-10 21:33:00		32
2022-06-10 21:43:00			34.0625	34.6875
2022-06-10 21:53:00	34.875
2022-06-10 22:03:00		32.375
2022-06-10 22:13:00			34	34.8125
2022-06-10 22:23:00	34.9375	32.0625
2022-06-10 22:43:00			34.0625	34.75
2022-06-10 22:53:00	34.8125	32.1875
2022-06-10 23:13:00			33.8125	34.75
2022-06-10 23:23:00	34.9375	32.1875
2022-06-10 23:43:00			33.75	34.6875
2022-06-10 23:53:00	34.875	32.375
2022-06-11 00:13:00			33.8125	34.625
2022-06-11 00:23:00	34.875	32.375
2022-06-11 00:44:00			33.8125
2022-06-11 00:54:00	34.9375	32.4375
2022-06-11 01:14:00	34.8125		33.8125
2022-06-11 01:24:00		32.4375
2022-06-11 01:34:00			33.75	34.4375
2022-06-11 01:44:00	34.8125
2022-06-11 01:54:00		32.125
2022-06-11 02:04:00			33.6875	34.1875
2022-06-11 02:14:00	34.875
2022-06-11 02:24:00		32.0625
2022-06-11 02:34:00			33.6875
2022-06-11 02:44:00	34.8125
2022-06-11 02:54:00		32.4375
2022-06-11 03:04:00			33.875	33.8125
2022-06-11 03:14:00	34.875
2022-06-11 03:24:00		32.4375
2022-06-11 03:34:00			33.6875
2022-06-11 03:44:00	34.875
2022-06-11 03:54:00		32.5625
2022-06-11 04:04:00			33.75	34.0625
2022-06-11 04:14:00	34.75
2022-06-11 04:24:00		32.5
2022-06-11 04:34:00			33.8125	34.0625
2022-06-11 04:44:00	34.75	32.8125
2022-06-11 05:04:00			33.6875	33.8125
2022-06-11 05:14:00	34.8125	32.75
2022-06-11 05:34:00			33.75	33.875
2022-06-11 05:44:00	34.75	32.75
2022-06-11 06:04:00			34	33.8125
2022-06-11 06:14:00	34.75	32.9375
2022-06-11 06:35:00			33.8125	34.0625
2022-06-11 06:44:00	34.75
2022-06-11 06:45:00		33.1875
2022-06-11 07:05:00	34.6875		33.75	33.875
2022-06-11 07:15:00		33.1875
2022-06-11 07:25:00				34
2022-06-11 07:35:00	34.75		33.8125
2022-06-11 07:45:00		33.1875
2022-06-11 07:55:00			33.75	33.875
2022-06-11 08:05:00	34.75
2022-06-11 08:15:00		33.25
2022-06-11 08:25:00			33.75	34.0625
2022-06-11 08:35:00	34.5625
2022-06-11 08:45:00		33.4375
2022-06-11 08:55:00			33.875	34.125
2022-06-11 09:05:00	34.625
2022-06-11 09:15:00		33.5
2022-06-11 09:25:00			33.9375	34.125
2022-06-11 09:35:00	34.5625
2022-06-11 09:45:00		33.75
2022-06-11 09:55:00			34.25	34.0625
2022-06-11 10:05:00	34.75
2022-06-11 10:15:00		33.8125
2022-06-11 10:25:00			34.4375	34.375
2022-06-11 10:35:00	34.75
2022-06-11 10:45:00		34
2022-06-11 10:55:00			34.8125	34.375
2022-06-11 11:05:00	34.625	34.0625
2022-06-11 11:25:00			35	34.4375
2022-06-11 11:35:00	34.875	34.0625
2022-06-11 11:55:00			35	34.3125
2022-06-11 12:05:00	34.875	34.125
2022-06-11 12:25:00			35.0625	34.3125
2022-06-11 12:35:00	34.875	34.1875
2022-06-11 12:55:00			34.875	34.0625
2022-06-11 13:05:00	34.9375	34.375
2022-06-11 13:26:00			34.6875	34.1875
2022-06-11 13:36:00	34.9375
2022-06-11 13:46:00				33.4375
2022-06-11 13:56:00	34.875		34.75
2022-06-11 14:06:00		33.9375
2022-06-11 14:16:00			34.4375	33.8125
2022-06-11 14:26:00	34.8125
2022-06-11 14:36:00		33.8125
2022-06-11 14:46:00			34.1875	34.3125
2022-06-11 14:56:00	34.875
2022-06-11 15:06:00		33.6875
2022-06-11 15:16:00			34.25	34.3125
2022-06-11 15:26:00	34.8125
2022-06-11 15:36:00		33.375
2022-06-11 15:46:00			34.25	34.5
2022-06-11 15:56:00	34.6875
2022-06-11 16:06:00		33.5
2022-06-11 16:16:00			34.4375	34.375
2022-06-11 16:26:00	34.625
2022-06-11 16:36:00		33.5
2022-06-11 16:46:00			34.8125	34.4375
2022-06-11 16:56:00	34.75
2022-06-11 17:06:00		33.3125
2022-06-11 17:16:00			34.625	34.5
2022-06-11 17:26:00	34.625	33.1875
2022-06-11 17:46:00			34.5625	34.4375
2022-06-11 17:56:00	34.625	32.75
2022-06-11 18:16:00			34.3125	34.4375
2022-06-11 18:26:00	34.75	32.625
2022-06-11 18:46:00			34.25	34.3125
2022-06-11 18:56:00	34.75	32.5
2022-06-11 19:16:00			33.8125	34.25
2022-06-11 19:26:00	34.8125	31.9375
2022-06-11 19:46:00	34.75		34.125	34.375
2022-06-11 19:56:00		32.1875
2022-06-11 20:06:00			34.1875	34.5
2022-06-11 20:17:00	34.75
2022-06-11 20:26:00		32
2022-06-11 20:36:00			33.9375	34.625
2022-06-11 20:46:00	34.8125
2022-06-11 20:56:00		32.125
2022-06-11 21:06:00			34	34.8125
2022-06-11 21:16:00	34.6875
2022-06-11 21:26:00		32.0625
2022-06-11 21:36:00			34	35.0625
2022-06-11 21:46:00	34.6875
2022-06-11 21:56:00		32.0625
2022-06-11 22:06:00			34.0625	35.125
2022-06-11 22:16:00	34.75
2022-06-11 22:26:00		32
2022-06-11 22:36:00			33.875	35
2022-06-11 22:46:00	34.6875
2022-06-11 22:56:00		31.8125
2022-06-11 23:06:00			33.8125	34.9375
2022-06-11 23:16:00	34.75
2022-06-11 23:17:00		31.5625
2022-06-11 23:37:00			33.5625	34.9375
2022-06-11 23:47:00	34.8125
2022-06-12 00:07:00			34.0625	34.875
2022-06-12 00:17:00	34.8125	31.3125
2022-06-12 00:37:00			33.8125	34.9375
2022-06-12 00:47:00	34.875	31.375
2022-06-12 01:07:00			33.875	34.875
2022-06-12 01:17:00	34.8125	31.125
2022-06-12 01:27:00			33.6875
2022-06-12 01:37:00	34.6875			34.625
2022-06-12 01:47:00		31.0625
2022-06-12 01:57:00			33.8125
2022-06-12 02:07:00	34.6875			34.5
2022-06-12 02:17:00		31.5
2022-06-12 02:27:00			33.5	34.375
2022-06-12 02:37:00	34.6875
2022-06-12 02:47:00		31.625
2022-06-12 02:57:00			33.3125	34.125
2022-06-12 03:07:00	34.6875
2022-06-12 03:17:00		31.5
2022-06-12 03:27:00			33.5625	34.25
2022-06-12 03:37:00	34.6875
2022-06-12 03:47:00		31.8125
2022-06-12 03:57:00			33.4375	34.25
2022-06-12 04:07:00	34.6875
2022-06-12 04:17:00		32.0625
2022-06-12 04:27:00			33.1875	34.1875
2022-06-12 04:37:00	34.6875
2022-06-12 04:47:00		32.1875
2022-06-12 04:57:00			33.5625	34.25
2022-06-12 05:07:00	34.6875
2022-06-12 05:17:00		32.625
2022-06-12 05:27:00			33.625	34.0625
2022-06-12 05:37:00	34.75
2022-06-12 05:47:00		33.3125
2022-06-12 05:57:00			33.75	34.0625
2022-06-12 06:07:00	34.8125	33.8125
2022-06-12 06:27:00			33.875	34.25
2022-06-12 06:37:00	34.875	34.0625
2022-06-12 06:58:00			34	34.3125
2022-06-12 07:08:00	34.9375	34.375
2022-06-12 07:28:00			34.25	34.375
2022-06-12 07:38:00	34.9375	34.4375
2022-06-12 07:58:00	34.9375		34.5	34.3125
2022-06-12 08:08:00		34.4375
2022-06-12 08:18:00			34.8125
2022-06-12 08:28:00	34.875			34.3125
2022-06-12 08:38:00		34.375
2022-06-12 08:48:00			34.875
2022-06-12 08:58:00	34.875
2022-06-12 09:08:00		34.25
2022-06-12 09:18:00			35	34.0625
2022-06-12 09:28:00	34.75
2022-06-12 09:38:00		34.25
2022-06-12 09:48:00			34.75	33.8125
2022-06-12 09:58:00	34.75
2022-06-12 10:08:00		34.125
2022-06-12 10:18:00			34.6875
2022-06-12 10:28:00	34.875
2022-06-12 10:38:00		34.125
2022-06-12 10:48:00			34.75
2022-06-12 10:58:00	34.9375
2022-06-12 11:08:00		34.125
2022-06-12 11:18:00			34.6875
2022-06-12 11:28:00	34.875
2022-06-12 11:38:00		34.1875
2022-06-12 11:48:00			34.8125
2022-06-12 11:58:00	34.875
2022-06-12 12:08:00		34.125
2022-06-12 12:18:00			34.6875
2022-06-12 12:28:00	34.8125	34.1875
2022-06-12 12:48:00			34.9375
2022-06-12 12:58:00	34.75	34.25
2022-06-12 13:18:00			35	33.5625
2022-06-12 13:28:00	34.875	34.375
2022-06-12 13:49:00			35.0625
2022-06-12 13:59:00	34.8125	34.1875
2022-06-12 14:19:00	34.8125		35
2022-06-12 14:29:00		34
2022-06-12 14:39:00			35.125
2022-06-12 14:49:00	34.8125
2022-06-12 14:59:00		33.875
2022-06-12 15:09:00			34.9375
2022-06-12 15:19:00	34.6875
2022-06-12 15:29:00		33.8125
2022-06-12 15:39:00			34.6875
2022-06-12 15:49:00	34.6875
2022-06-12 15:59:00		33.875
2022-06-12 16:09:00			34.75	34.125
2022-06-12 16:19:00	34.5625
2022-06-12 16:29:00		33.4375
2022-06-12 16:39:00			34.8125
2022-06-12 16:49:00	34.5625
2022-06-12 16:59:00		33.0625
2022-06-12 17:09:00			34.8125	34.25
2022-06-12 17:19:00	34.5625
2022-06-12 17:29:00		32.9375
2022-06-12 17:39:00			34.75	34.375
2022-06-12 17:49:00	34.4375
2022-06-12 17:59:00		32.375
2022-06-12 18:09:00			34.25	34.3125
2022-06-12 18:19:00	34.4375
2022-06-12 18:29:00		31.5625
2022-06-12 18:39:00			34	34.0625
2022-06-12 18:49:00	34.5	31.375
2022-06-12 19:09:00			33.9375	34
2022-06-12 19:19:00	34.4375	30.8125
2022-06-12 19:29:00				34
2022-06-12 19:39:00			33.8125
2022-06-12 19:49:00	34.4375	29.75
2022-06-12 19:59:00				33.9375
2022-06-12 20:09:00			33.625
2022-06-12 20:19:00	34.4375	30.1875
2022-06-12 20:29:00			33.9375	34.1875
2022-06-12 20:39:00	34.4375
2022-06-12 20:49:00		29.875
2022-06-12 20:59:00			33.75	34.3125
2022-06-12 21:09:00	34.5
2022-06-12 21:19:00		29.75
2022-06-12 21:29:00			33.5625	34.5
2022-06-12 21:39:00	34.625
2022-06-12 21:49:00		29.375
2022-06-12 21:59:00			34	34.5625
2022-06-12 22:09:00	34.75
2022-06-12 22:19:00		29.25
2022-06-12 22:29:00			33.6875	34.6875
2022-06-12 22:39:00	34.75
2022-06-12 22:49:00		28.5
2022-06-12 22:59:00			33.625	34.625
2022-06-12 23:09:00	34.8125
2022-06-12 23:19:00		28.75
2022-06-12 23:29:00			33.625	34.6875
2022-06-12 23:39:00	34.875
2022-06-12 23:49:00		28.375
2022-06-12 23:59:00			33.5625	34.75
2022-06-13 00:09:00	34.8125
2022-06-13 00:19:00		27.9375
2022-06-13 00:29:00			33.1875	34.6875
2022-06-13 00:39:00	34.75
2022-06-13 00:49:00		27.5625
2022-06-13 00:59:00			33.625	34.6875
2022-06-13 01:09:00	34.75	27.0625
2022-06-13 01:29:00			33.4375	34.4375
2022-06-13 01:39:00	34.75	26.8125
2022-06-13 01:49:00				34.3125
2022-06-13 01:59:00			33.5625
2022-06-13 02:09:00	34.75	26.875
2022-06-13 02:19:00			33.4375	34.1875
2022-06-13 02:29:00	34.6875
2022-06-13 02:39:00		26.6875
2022-06-13 02:49:00			33.125	34.0625
2022-06-13 02:59:00	34.6875
2022-06-13 03:09:00		26.8125
2022-06-13 03:19:00			33.0625	34.125
2022-06-13 03:29:00	34.6875
2022-06-13 03:39:00		26.6875
2022-06-13 03:49:00			33.1875	34.1875
2022-06-13 03:59:00	34.625
2022-06-13 04:09:00		27.25
2022-06-13 04:19:00			33.0625	33.9375
2022-06-13 04:29:00	34.8125
2022-06-13 04:39:00		27.75
2022-06-13 04:49:00			33.1875	34.125
2022-06-13 04:59:00	34.75
2022-06-13 05:09:00		29.125
2022-06-13 05:19:00			33.125	33.9375
2022-06-13 05:29:00	34.75
2022-06-13 05:39:00		30.25
2022-06-13 05:49:00			33.25	34.0625
2022-06-13 05:59:00	34.75
2022-06-13 06:09:00		31.1875
2022-06-13 06:19:00			33.75	34.0625
2022-06-13 06:29:00	34.875
2022-06-13 06:39:00		32.0625
2022-06-13 06:49:00			33.8125	34
2022-06-13 06:59:00	34.875
2022-06-13 07:09:00		32.8125
2022-06-13 07:19:00			34	34
2022-06-13 07:29:00	34.8125
2022-06-13 07:39:00		33.25
2022-06-13 07:49:00			34.1875	34.125
2022-06-13 07:59:00	34.625	33.4375
2022-06-13 08:19:00			34.3125	34.3125
2022-06-13 08:29:00	34.6875	33.5
2022-06-13 08:50:00				34.5
2022-06-13 09:00:00	34.6875	33.75
2022-06-13 09:10:00				34.3125
2022-06-13 09:20:00	34.625
2022-06-13 09:30:00		33.625
2022-06-13 09:40:00				34.0625
2022-06-13 09:50:00	34.5
2022-06-13 10:00:00		33.4375
2022-06-13 10:10:00				33.6875
2022-06-13 10:20:00	34.5625
2022-06-13 10:30:00		33.375
2022-06-13 10:40:00				34.0625
2022-06-13 10:50:00	34.5
2022-06-13 11:00:00		33.4375
2022-06-13 11:10:00				34.0625
2022-06-13 11:20:00	34.5
2022-06-13 11:30:00		33.3125
2022-06-13 11:40:00				34.125
2022-06-13 11:50:00	34.5625
2022-06-13 12:00:00		33.375
2022-06-13 12:20:00	34.5
2022-06-13 12:30:00		33.375
2022-06-13 12:40:00				33.9375
2022-06-13 12:50:00	34.5
2022-06-13 13:00:00		33.5625
2022-06-13 13:10:00				33.9375
2022-06-13 13:20:00	34.5
2022-06-13 13:30:00		33.4375
2022-06-13 13:40:00				33.6875
2022-06-13 13:50:00	34.5625
2022-06-13 14:00:00		33.4375
2022-06-13 14:10:00			34.4375
2022-06-13 14:20:00	34.5625
2022-06-13 14:30:00		33.5
2022-06-13 14:40:00			34.4375
2022-06-13 14:50:00	34.5	33.3125
2022-06-13 15:10:00			34.25
2022-06-13 15:20:00	34.375	33.25
2022-06-13 15:40:00			34.25
2022-06-13 15:50:00	34.375	33.125
2022-06-13 16:10:00	34.375		34.125
2022-06-13 16:20:00		32.875
2022-06-13 16:30:00				33.6875
2022-06-13 16:40:00	34.375		34.125
2022-06-13 16:50:00		32.4375
2022-06-13 17:11:00	34.3125		34
2022-06-13 17:21:00		32.0625
2022-06-13 17:41:00	34.375		33.875
2022-06-13 17:51:00		31
2022-06-13 18:11:00	34.3125		33.625
2022-06-13 18:21:00		30.625
2022-06-13 18:41:00	34.375		33.8125
2022-06-13 18:51:00		30.3125
2022-06-13 19:01:00			33.5625
2022-06-13 19:11:00	34.375
2022-06-13 19:21:00		30.4375
2022-06-13 19:31:00			33.5625
2022-06-13 19:41:00	34.5
2022-06-13 19:51:00		30.625
2022-06-13 20:01:00			33.625
2022-06-13 20:11:00	34.4375
2022-06-13 20:21:00		30.5		33.9375
2022-06-13 20:31:00			34
2022-06-13 20:41:00	34.5	30.4375
2022-06-13 20:51:00				34.125
2022-06-13 21:01:00			33.8125
2022-06-13 21:11:00	34.5	30.5
2022-06-13 21:21:00				34.3125
2022-06-13 21:31:00	34.5625		34
2022-06-13 21:41:00		30.875
2022-06-13 21:51:00				34.375
2022-06-13 22:01:00	34.5		33.9375
2022-06-13 22:11:00		30.8125
2022-06-13 22:31:00	34.5		33.75
2022-06-13 22:41:00		30.6875
2022-06-13 22:51:00				34.5
2022-06-13 23:01:00	34.5625		33.9375
2022-06-13 23:11:00		30.875
2022-06-13 23:21:00				34.5
2022-06-13 23:31:00	34.625		33.8125
2022-06-13 23:41:00		30.75
2022-06-13 23:51:00				34.4375
2022-06-14 00:01:00	34.625		33.125
2022-06-14 00:11:00		30.9375
2022-06-14 00:21:00				34.5
2022-06-14 00:31:00	34.625		33.6875
2022-06-14 00:41:00		31.375
2022-06-14 00:51:00			33.5625	34.5
2022-06-14 01:01:00	34.5625
2022-06-14 01:11:00		31.625
2022-06-14 01:21:00			33.625	34.5625
2022-06-14 01:31:00	34.5
2022-06-14 01:41:00		31.5		34.375
2022-06-14 01:51:00			33.125
2022-06-14 02:01:00	34.5625
2022-06-14 02:11:00		31.9375		34.3125
2022-06-14 02:21:00			33.625
2022-06-14 02:31:00	34.5625
2022-06-14 02:41:00		31.8125		34.25
2022-06-14 02:51:00			33.4375
2022-06-14 03:01:00	34.5	32.0625
2022-06-14 03:11:00				34.5
2022-06-14 03:21:00			33.3125
2022-06-14 03:31:00	34.5	31.8125
2022-06-14 03:41:00				34.3125
2022-06-14 03:51:00	34.375		33.125
2022-06-14 04:01:00		31.8125
2022-06-14 04:11:00				34.1875
2022-06-14 04:21:00	34.5625		33.0625
2022-06-14 04:31:00		32.1875
2022-06-14 04:41:00				34.0625
2022-06-14 04:51:00	34.5625		33.375
2022-06-14 05:01:00		32.375
2022-06-14 05:11:00				34.125
2022-06-14 05:21:00	34.4375		33.375
2022-06-14 05:31:00		32.375
2022-06-14 05:41:00				34.25
2022-06-14 05:51:00	34.4375		33.1875
2022-06-14 06:01:00		32.3125
2022-06-14 06:11:00				33.875
2022-06-14 06:21:00	34.4375		33.5
2022-06-14 06:31:00		32.4375
2022-06-14 06:41:00				33.875
2022-06-14 06:51:00	34.4375		33.375
2022-06-14 07:01:00		32.375
2022-06-14 07:11:00			33.3125	33.9375
2022-06-14 07:21:00	34.375
2022-06-14 07:31:00		32.8125
2022-06-14 07:41:00			33.4375	34
2022-06-14 07:51:00	34.375
2022-06-14 08:01:00		32.9375
2022-06-14 08:11:00			33.0625	34
2022-06-14 08:21:00	34.3125
2022-06-14 08:31:00		32.875		34.0625
2022-06-14 08:41:00			33.4375
2022-06-14 08:51:00	34.25
2022-06-14 09:01:00		32.8125		34.125
2022-06-14 09:11:00			33.5
2022-06-14 09:21:00	34.1875
2022-06-14 09:31:00		33.0625		34.125
2022-06-14 09:41:00			33.4375
2022-06-14 09:51:00	34.25	33.0625
2022-06-14 10:01:00				34.1875
2022-06-14 10:11:00			33.1875
2022-06-14 10:21:00	34.25	33.25
2022-06-14 10:31:00				34.1875
2022-06-14 10:41:00	34.1875		33.375
2022-06-14 10:51:00		33.3125
2022-06-14 11:01:00				34.3125
2022-06-14 11:11:00	34.125		33.5625
2022-06-14 11:21:00		33.3125
2022-06-14 11:31:00				34.1875
2022-06-14 11:41:00	34.0625		33.375
2022-06-14 11:51:00		33.4375
2022-06-14 12:01:00				34.125
2022-06-14 12:11:00	34.125		33.3125
2022-06-14 12:21:00		33.375
2022-06-14 12:31:00				34
2022-06-14 12:41:00	34.0625		33.5625
2022-06-14 12:51:00		33.3125
2022-06-14 13:01:00				34.125
2022-06-14 13:11:00	34		33.625
2022-06-14 13:21:00		33
2022-06-14 13:31:00				34.125
2022-06-14 13:41:00	34.0625		33.8125
2022-06-14 13:51:00		32.875
2022-06-14 14:01:00			33.875	34.0625
2022-06-14 14:11:00	34.125
2022-06-14 14:21:00		32.625
2022-06-14 14:32:00			33.75	34.0625
2022-06-14 14:41:00	34.0625
2022-06-14 14:51:00		32.5
2022-06-14 15:01:00			33.5	34.0625
2022-06-14 15:11:00	34.0625
2022-06-14 15:22:00		32.25
2022-06-14 15:31:00			33.4375	34.0625
2022-06-14 15:41:00	33.9375
2022-06-14 15:51:00		31.75		34.125
2022-06-14 16:02:00			33.5
2022-06-14 16:11:00	34
2022-06-14 16:22:00		31.875		34.1875
2022-06-14 16:32:00			33.1875
2022-06-14 16:42:00	34.0625	32
2022-06-14 16:51:00				34.0625
2022-06-14 17:02:00			33.5
2022-06-14 17:12:00	34.0625	32.125
2022-06-14 17:22:00				34.1875
2022-06-14 17:32:00	34.0625		33.875
2022-06-14 17:42:00		32.25
2022-06-14 17:52:00				34
2022-06-14 18:02:00	34.0625		33.75
2022-06-14 18:12:00		32.1875
2022-06-14 18:22:00				34
2022-06-14 18:32:00	34.0625		33.5625
2022-06-14 18:42:00		32.5
2022-06-14 18:52:00				34
2022-06-14 19:02:00	34		33.75
2022-06-14 19:12:00		32.375
2022-06-14 19:22:00				34.125
2022-06-14 19:32:00	34.0625		33.875
2022-06-14 19:42:00		32.375
2022-06-14 19:52:00				34.3125
2022-06-14 20:02:00	34		33.375
2022-06-14 20:12:00		32.4375
2022-06-14 20:22:00			33.25	34.375
2022-06-14 20:32:00	34.1875
2022-06-14 20:42:00		32.25
2022-06-14 20:52:00			33.6875	34.5625
2022-06-14 21:02:00	34.0625
2022-06-14 21:12:00		32.5
2022-06-14 21:22:00			33.6875	34.5625
2022-06-14 21:32:00	34.1875
2022-06-14 21:42:00		32.4375
2022-06-14 21:52:00			33.1875	34.625
2022-06-14 22:02:00	34.1875
2022-06-14 22:12:00		32.375
2022-06-14 22:22:00			33.5	34.6875
2022-06-14 22:32:00	34.25
2022-06-14 22:42:00		32.4375		34.625
2022-06-14 22:52:00			33.4375
2022-06-14 23:02:00	34.3125	32.6875
2022-06-14 23:12:00				34.5625
2022-06-14 23:22:00			33.5
2022-06-14 23:32:00	34.25	32.5
2022-06-14 23:42:00				34.6875
2022-06-14 23:52:00	34.25		33.5
2022-06-15 00:02:00		32.875
2022-06-15 00:12:00				34.625
2022-06-15 00:22:00	34.1875		33.6875
2022-06-15 00:32:00		32.8125
2022-06-15 00:42:00				34.5625
2022-06-15 00:52:00	34.25		33.375
2022-06-15 01:02:00		32.6875
2022-06-15 01:12:00				34.5
2022-06-15 01:22:00	34.375		33.3125
2022-06-15 01:32:00		32.875
2022-06-15 01:42:00				34.4375
2022-06-15 01:52:00	34.25		32.875
2022-06-15 02:02:00		32.75
2022-06-15 02:12:00				34.4375
2022-06-15 02:22:00	34.25		33.1875
2022-06-15 02:32:00		32.8125
2022-06-15 02:42:00			33.625	34.4375
2022-06-15 02:52:00	34.1875
2022-06-15 03:02:00		32.8125
2022-06-15 03:12:00			33.125	34.3125
2022-06-15 03:22:00	34.1875
2022-06-15 03:32:00		33.125
2022-06-15 03:42:00			33.25	34.3125
2022-06-15 03:52:00	34.25
2022-06-15 04:02:00		33
2022-06-15 04:12:00			33.5625	34.375
2022-06-15 04:22:00	34.25
2022-06-15 04:32:00		32.9375
2022-06-15 04:42:00			33.4375	34.3125
2022-06-15 04:52:00	34.3125
2022-06-15 05:02:00		33.125
2022-06-15 05:12:00			33.6875	34.25
2022-06-15 05:22:00	34.1875
2022-06-15 05:32:00		33.125		34.3125
2022-06-15 05:42:00			33.6875
2022-06-15 05:52:00	34.3125
2022-06-15 06:02:00		33.375		34.3125
2022-06-15 06:12:00			33.6875
2022-06-15 06:22:00	34.3125	33.5625
2022-06-15 06:42:00	34.25		34
2022-06-15 06:52:00		33.75
2022-06-15 07:02:00				34.125
2022-06-15 07:12:00	34.3125		33.75
2022-06-15 07:22:00		34
2022-06-15 07:32:00				34.25
2022-06-15 07:42:00	34.4375		34.1875
2022-06-15 07:52:00		34.125
2022-06-15 08:02:00				34.1875
2022-06-15 08:12:00	34.5		34.125
2022-06-15 08:22:00		34.125
2022-06-15 08:32:00				34.6875
2022-06-15 08:42:00	34.375		34.25
2022-06-15 08:52:00		34.125
2022-06-15 09:02:00				34.4375
2022-06-15 09:12:00	34.375		34.4375
2022-06-15 09:22:00		34
2022-06-15 09:32:00			34.5625	34.5
2022-06-15 09:42:00	34.5
2022-06-15 09:52:00		33.9375
2022-06-15 10:02:00			34.5625	34.625
2022-06-15 10:12:00	34.4375
2022-06-15 10:22:00		33.875
2022-06-15 10:32:00			34.5625	34.625
2022-06-15 10:42:00	34.375
2022-06-15 10:52:00		33.75
2022-06-15 11:02:00			34.625	34.6875
2022-06-15 11:12:00	34.4375
2022-06-15 11:22:00		34
2022-06-15 11:32:00			34.5	34.6875
2022-06-15 11:42:00	34.5
2022-06-15 11:52:00		34.375
2022-06-15 12:02:00			34.4375	34.75
2022-06-15 12:12:00	34.4375
2022-06-15 12:22:00		34.125
2022-06-15 12:32:00			34.6875	34.3125
2022-06-15 12:42:00	34.5625
2022-06-15 12:52:00		33.875		34.25
2022-06-15 13:02:00			34.5625
2022-06-15 13:12:00	34.5625	34
2022-06-15 13:22:00				34.5625
2022-06-15 13:32:00	34.5		34.5625
2022-06-15 13:42:00		34
2022-06-15 13:52:00				34.6875
2022-06-15 14:02:00	34.5		34.5625
2022-06-15 14:12:00		33.8125
2022-06-15 14:22:00				34.5625
2022-06-15 14:32:00	34.5625		34.5625
2022-06-15 14:42:00		33.5625
2022-06-15 14:52:00				34.5625
2022-06-15 15:02:00	34.5625		34.4375
2022-06-15 15:12:00		33.4375
2022-06-15 15:22:00				34.625
2022-06-15 15:32:00	34.4375		34.75
2022-06-15 15:42:00		33.3125
2022-06-15 15:52:00				34.625
2022-06-15 16:02:00	34.5		34.75
2022-06-15 16:12:00		33.25
2022-06-15 16:22:00			34.75	34.5625
2022-06-15 16:32:00	34.5
2022-06-15 16:42:00		32.8125
2022-06-15 16:52:00			34.6875	34.5625
2022-06-15 17:02:00	34.4375
2022-06-15 17:12:00		32.4375
2022-06-15 17:22:00			34.5	34.4375
2022-06-15 17:32:00	34.4375
2022-06-15 17:42:00		32.0625
2022-06-15 17:52:00			34.375	34.4375
2022-06-15 18:02:00	34.4375
2022-06-15 18:12:00		32.0625
2022-06-15 18:22:00			34.1875	34.375
2022-06-15 18:32:00	34.4375
2022-06-15 18:42:00		31.4375
2022-06-15 18:52:00			34	34.3125
2022-06-15 19:02:00	34.375
2022-06-15 19:12:00		31.1875		34.25
2022-06-15 19:22:00			33.625
2022-06-15 19:32:00	34.375
2022-06-15 19:42:00		30.625		34.25
2022-06-15 19:52:00	34.375		33.875
2022-06-15 20:02:00		30.5
2022-06-15 20:12:00				34.375
2022-06-15 20:22:00	34.375		33.625
2022-06-15 20:32:00		30.6875
2022-06-15 20:42:00				34.625
2022-06-15 20:52:00	34.375		33.75
2022-06-15 21:02:00		30.875
2022-06-15 21:12:00				34.75
2022-06-15 21:22:00	34.4375		34
2022-06-15 21:32:00		30.875
2022-06-15 21:42:00				35.0625
2022-06-15 21:52:00	34.5		33.6875
2022-06-15 22:02:00		30.75
2022-06-15 22:12:00			33.8125	35
2022-06-15 22:22:00	34.5625
2022-06-15 22:32:00		30.5625
2022-06-15 22:42:00			33.8125	34.875
2022-06-15 22:52:00	34.6875
2022-06-15 23:02:00		30.5
2022-06-15 23:12:00			33.8125	34.875
2022-06-15 23:22:00	34.5625
2022-06-15 23:32:00		30.375
2022-06-15 23:42:00			33.875	34.875
2022-06-15 23:52:00	34.5625
2022-06-16 00:02:00		30.3125
2022-06-16 00:12:00			33.75	34.875
2022-06-16 00:22:00	34.625
2022-06-16 00:32:00		30.25
2022-06-16 00:42:00			33.625	34.875
2022-06-16 00:52:00	34.625
2022-06-16 01:02:00		29.75
2022-06-16 01:12:00			33.75	34.625
2022-06-16 01:22:00	34.625
2022-06-16 01:32:00		30.1875
2022-06-16 01:42:00			33.875	34.4375
2022-06-16 01:52:00	34.625
2022-06-16 02:02:00		29.6875		34.5625
2022-06-16 02:12:00	34.6875		33.4375
2022-06-16 02:22:00		29.6875
2022-06-16 02:32:00				34.5625
2022-06-16 02:42:00	34.5625		33.75
2022-06-16 02:52:00		29.375
2022-06-16 03:02:00				34.375
2022-06-16 03:12:00	34.5625		33.6875
2022-06-16 03:22:00		29.625
2022-06-16 03:32:00				34.375
2022-06-16 03:42:00	34.4375		33.0625
2022-06-16 03:52:00		29.8125
2022-06-16 04:02:00				34.375
2022-06-16 04:12:00	34.4375		33.5625
2022-06-16 04:22:00		30.5625
2022-06-16 04:32:00			33.375	34.5
2022-06-16 04:42:00	34.375
2022-06-16 04:52:00		30.875
2022-06-16 05:02:00			33.3125	34.4375
2022-06-16 05:12:00	34.5
2022-06-16 05:32:00			33.75	34.4375
2022-06-16 05:42:00	34.375
2022-06-16 05:52:00		31.5
2022-06-16 06:02:00			33.5	34.25
2022-06-16 06:12:00	34.3125
2022-06-16 06:22:00		32.0625
2022-06-16 06:32:00			33.625	34.25
2022-06-16 06:42:00	34.375
2022-06-16 06:52:00		32.6875
2022-06-16 07:02:00			33.8125
2022-06-16 07:12:00	34.4375
2022-06-16 07:22:00		33
2022-06-16 07:32:00			33.75	34.4375
2022-06-16 07:42:00	34.4375
2022-06-16 07:52:00		33.25
2022-06-16 08:02:00			33.9375
2022-06-16 08:12:00	34.4375
2022-06-16 08:22:00		33.5625
2022-06-16 08:32:00			34.4375	34.5625
2022-06-16 08:42:00	34.4375
2022-06-16 08:52:00		33.75
2022-06-16 09:02:00	34.4375		34.5625
2022-06-16 09:22:00		33.75		34.5625
2022-06-16 09:32:00	34.5		34.5625
2022-06-16 09:42:00		33.6875
2022-06-16 10:02:00	34.4375		34.5
2022-06-16 10:12:00		33.75
2022-06-16 10:22:00				34.4375
2022-06-16 10:32:00	34.5		34.375
2022-06-16 10:42:00		33.875
2022-06-16 10:52:00				34.375
2022-06-16 11:02:00	34.4375		34.25
2022-06-16 11:12:00		33.875
2022-06-16 11:22:00			34.375
2022-06-16 11:32:00	34.375
2022-06-16 11:42:00		33.8125
2022-06-16 11:52:00			34.375	34.375
2022-06-16 12:02:00	34.375
2022-06-16 12:12:00		33.6875
2022-06-16 12:22:00			34.5	34.3125
2022-06-16 12:32:00	34.375
2022-06-16 12:42:00		33.5
2022-06-16 12:52:00			34.4375	34.25
2022-06-16 13:02:00	34.375
2022-06-16 13:12:00		33.4375
2022-06-16 13:22:00			34.1875	34
2022-06-16 13:32:00	34.4375
2022-06-16 13:42:00		33.5
2022-06-16 13:52:00			34.4375	34.1875
2022-06-16 14:02:00	34.4375
2022-06-16 14:12:00		33.5
2022-06-16 14:22:00			34.875
2022-06-16 14:32:00	34.5
2022-06-16 14:42:00		33.6875
2022-06-16 14:52:00			35.125
2022-06-16 15:02:00	34.4375
2022-06-16 15:12:00		33.875		33.9375
2022-06-16 15:22:00			35.25
2022-06-16 15:32:00	34.5
2022-06-16 15:42:00		33.8125		34.125
2022-06-16 15:52:00	34.4375		35.0625
2022-06-16 16:02:00		33.6875
2022-06-16 16:12:00				34.3125
2022-06-16 16:22:00	34.4375		35.125
2022-06-16 16:32:00		33.5625
2022-06-16 16:42:00				34.4375
2022-06-16 16:52:00	34.4375		34.875
2022-06-16 17:02:00		33.0625
2022-06-16 17:12:00				34.5
2022-06-16 17:22:00	34.4375		34.3125
2022-06-16 17:32:00		32.3125
2022-06-16 17:42:00			34.1875	34.3125
2022-06-16 17:52:00	34.5
2022-06-16 18:02:00		31.8125
2022-06-16 18:12:00			33.9375	34.25
2022-06-16 18:22:00	34.375
2022-06-16 18:32:00		31.3125
2022-06-16 18:42:00			33.6875	34.1875
2022-06-16 18:52:00	34.4375
2022-06-16 19:02:00		30.875
2022-06-16 19:12:00			33.5	34.0625
2022-06-16 19:22:00	34.375
2022-06-16 19:32:00		30.9375
2022-06-16 19:42:00			33.5625	34.125
2022-06-16 19:52:00	34.4375
2022-06-16 20:02:00		30.6875
2022-06-16 20:12:00			33.875	34.375
2022-06-16 20:22:00	34.4375
2022-06-16 20:32:00		30.6875
2022-06-16 20:42:00			34.0625	34.3125
2022-06-16 20:52:00	34.375
2022-06-16 21:02:00		31		34.625
2022-06-16 21:12:00			34
2022-06-16 21:22:00	34.4375
2022-06-16 21:32:00		31.3125		34.625
2022-06-16 21:42:00			34.1875
2022-06-16 21:52:00	34.5
2022-06-16 22:02:00		31.3125		34.875
2022-06-16 22:12:00	34.4375		34.0625
2022-06-16 22:32:00		31.3125		35.0625
2022-06-16 22:42:00	34.4375		33.875
2022-06-16 22:52:00		31.375
2022-06-16 23:02:00				34.9375
2022-06-16 23:12:00	34.5		34.0625
2022-06-16 23:22:00		31.125
2022-06-16 23:32:00			34.0625	35
2022-06-16 23:42:00	34.5625
2022-06-16 23:52:00		31.25
2022-06-17 00:02:00			33.875	34.75
2022-06-17 00:12:00	34.5625
2022-06-17 00:22:00		31.3125
2022-06-17 00:32:00			34.125	34.8125
2022-06-17 00:42:00	34.5625
2022-06-17 00:52:00		31
2022-06-17 01:02:00			34.0625	34.875
2022-06-17 01:12:00	34.5
2022-06-17 01:22:00		30.9375
2022-06-17 01:32:00			34	34.6875
2022-06-17 01:42:00	34.5
2022-06-17 01:52:00		31.0625
2022-06-17 02:02:00			33.4375	34.5625
2022-06-17 02:12:00	34.4375
2022-06-17 02:22:00		31.125
2022-06-17 02:32:00			33.6875	34.5625
2022-06-17 02:42:00	34.5
2022-06-17 03:02:00			33.875	34.4375
2022-06-17 03:12:00	34.4375
2022-06-17 03:22:00		31		34.625
2022-06-17 03:32:00			33.875
2022-06-17 03:42:00	34.375
2022-06-17 03:52:00		31.0625		34.6875
2022-06-17 04:02:00			33.375
2022-06-17 04:12:00	34.3125
2022-06-17 04:22:00		31.625		34.375
2022-06-17 04:32:00	34.3125		33.75
2022-06-17 04:52:00		32.4375		34.4375
2022-06-17 05:02:00	34.25		33.3125
2022-06-17 05:22:00		32.9375
2022-06-17 05:32:00	34.25		33.5625
2022-06-17 05:42:00		33.4375
2022-06-17 06:03:00	34.3125		33.5625
2022-06-17 06:13:00		33.8125
2022-06-17 06:23:00			34
2022-06-17 06:33:00	34.3125
2022-06-17 06:43:00		33.9375
2022-06-17 06:53:00			33.875
2022-06-17 07:03:00	34.25
2022-06-17 07:13:00		34.125
2022-06-17 07:23:00			34.3125
2022-06-17 07:33:00	34.3125
2022-06-17 07:43:00		34.125
2022-06-17 07:53:00			34.375
2022-06-17 08:03:00	34.3125
2022-06-17 08:13:00		34.0625
2022-06-17 08:23:00			34.5625
2022-06-17 08:33:00	34.375
2022-06-17 08:43:00		34.0625
2022-06-17 08:53:00			34.5
[truncated: 8,101 more rows]
